# Supplementary material for: Fabrication and Characterization of Polypyrrole/Multi-Walled Carbon Nanotubes Thin Films Using Thermal Evaporation
Source: MDPI journal article supplement (doi:10.3390/polym13224045), 2021-11-22
Supplement: s1 [file s1]

# Fabrication and characterization of polypyrrole/multi-walled carbon nanotubes thin films using thermal evaporation

Alaa Attar <sup>1</sup>, Rima D. Alharthy <sup>2</sup>, Mohammed Zwawi <sup>1</sup>, Mohammed Algarni <sup>1</sup>, Faisal Abatati <sup>1</sup>, Mohamed Bassyouni <sup>3,4,\*</sup>, Mohamed Helmy Abdel-Aziz <sup>5,6</sup>, Mohamed Shafick Zoromba <sup>5,7</sup> and Ahmed F. Al-Hossainy <sup>8</sup>

<sup>1</sup> Mechanical Engineering Department, King Abdulaziz University, Rabigh 21911, Saudi Arabia

<sup>2</sup> Department of Chemistry, Science and Arts College, Rabigh Campus, King Abdulaziz University, Jeddah, 21577, Saudi Arabia

<sup>3</sup> Department of Chemical Engineering, Faculty of Engineering, Port Said University, Port Fouad 42526, Egypt

<sup>4</sup> Materials Science Program, University of Science and Technology, Zewail City of Science and Technology, October Gardens, 6th of October, Giza 12578, Egypt

<sup>5</sup> Chemical and Materials Engineering Department, King Abdulaziz University, Rabigh 21911, Saudi Arabia

<sup>6</sup> Chemical Engineering Department, Faculty of Engineering, Alexandria University, Alexandria 21544, Egypt

<sup>7</sup> Chemistry Department, Faculty of Science, 23 December Street, 42521, Port-Said University, Port-Said, Egypt

<sup>8</sup> Chemistry Department, Faculty of Science, New Valley University, 72511 Al-Wadi Al-Gadid, Al-Kharga, Egypt

\* Correspondence: m.bassyouni@psu.edu.eg

## 2. Experimental

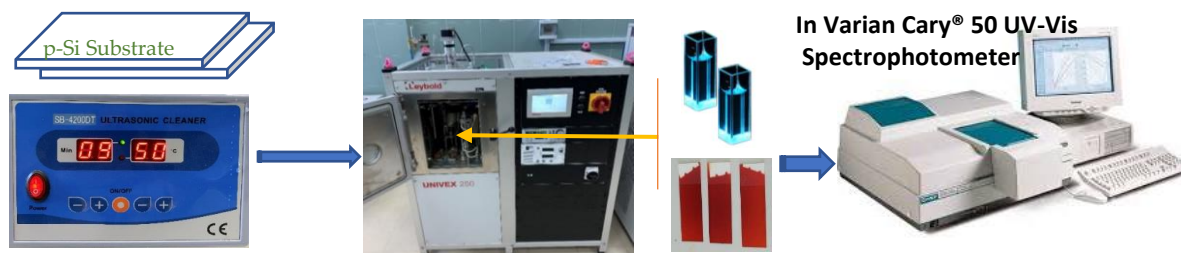

Figure S1. Fabrication and characterization of the thin films [PPy/MWCNTs] by using Physical Vapor Deposition (PVD).

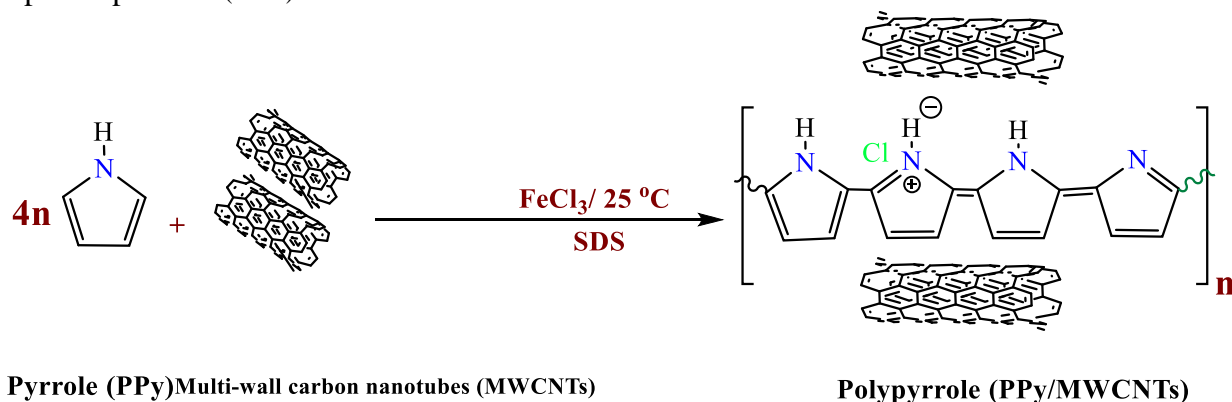

Figure S2. A scheme of pyrrole oxidative polymerization reaction and combination with MWCNTs to the formation of PPy/MWCNTs composites

### 3.1. FT-IR spectroscopy

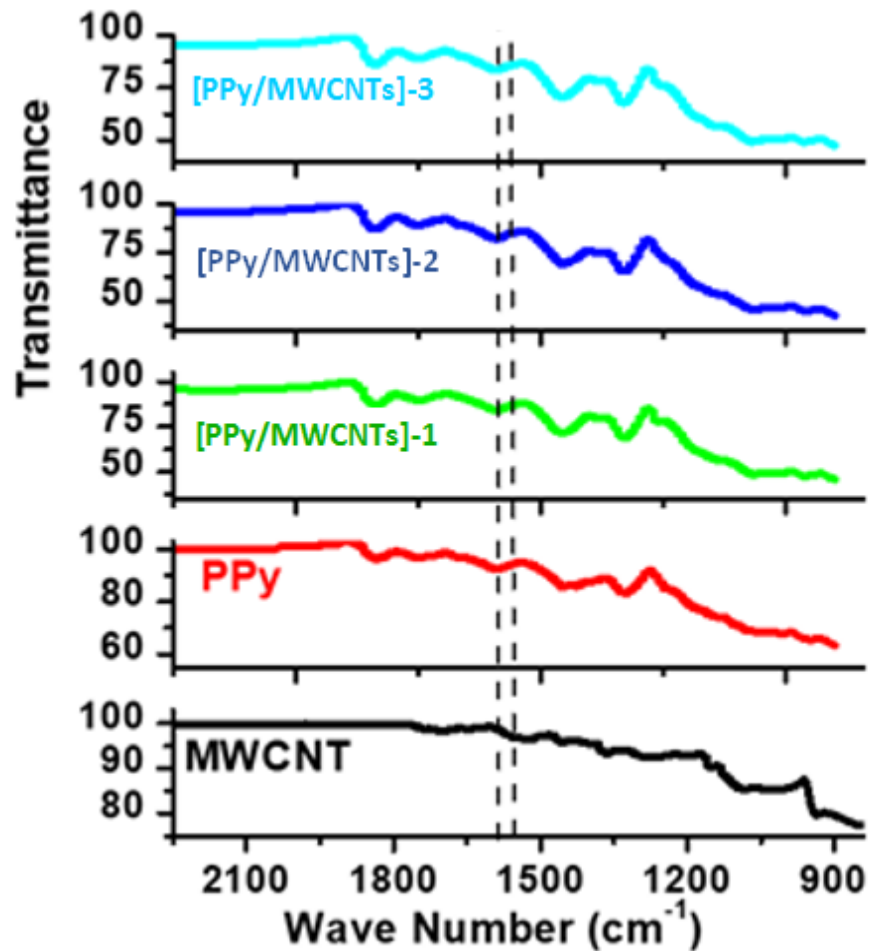

Figure S3. FTIR spectra of the MWCNTs/PPy nanocomposites. Spectra of the pure MWCNTs and PPy are also shown.

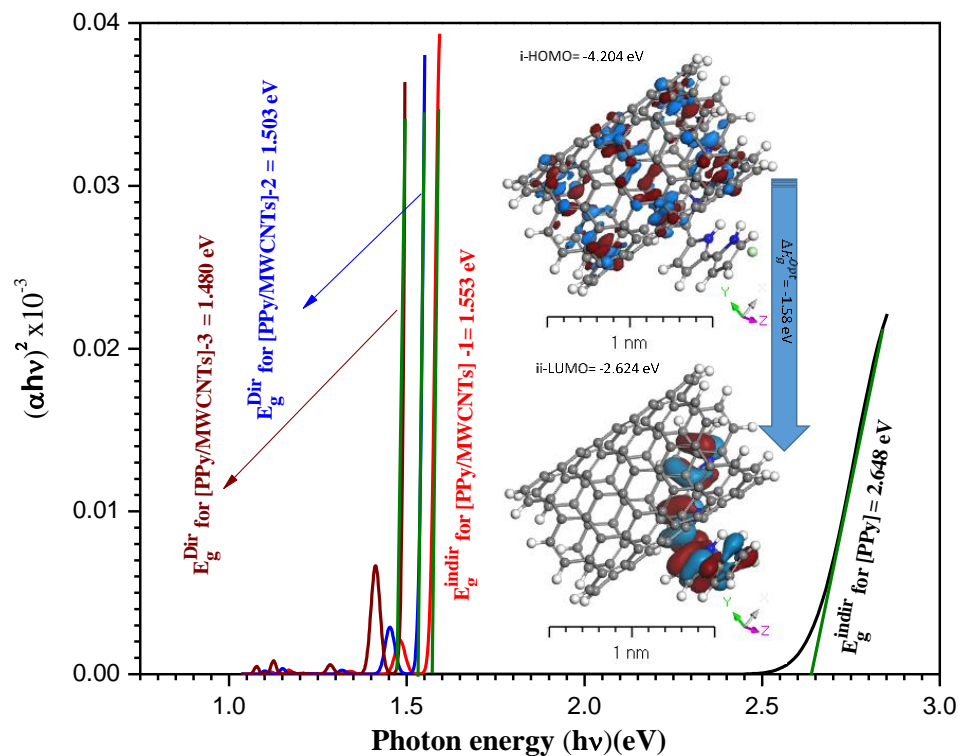

Figure S4. Plot direct  $(\alpha h\nu)^2$  vs photon energy  $(h\nu)$  eV for [PPy/MWCNTs] composites thin film, theoretical calculation HOMO and LUMO for [PPy/MWCNTs] composites gas phase.

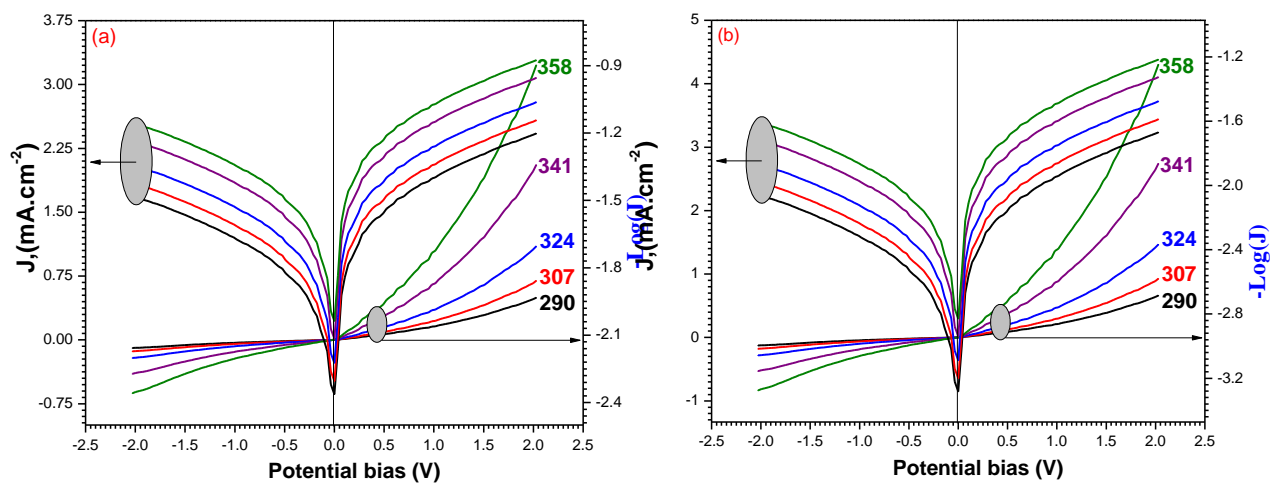

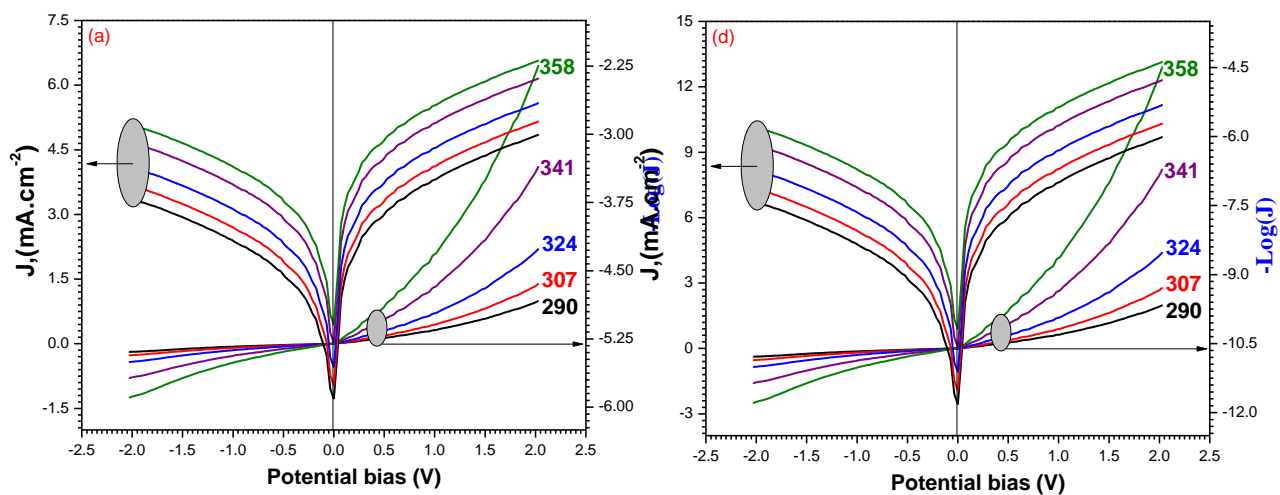

Figure S5. I -V characteristics curves and Log J for a) Au/[PPy]/n-Si/Al; b) Au/[PPy/MWCNTs]-1 composites/n-Si/Al; c) Au/[PPy/MWCNTs]-2 composites/n-Si/Al and d) Au/[PPy/MWCNTs]-3 composites/n-Si/Al heterojunction diode
